# Supplementary material for: Identifying the Hot Spot Residues of the SARS-CoV-2 Main Protease Using MM-PBSA and Multiple Force Fields
Source: MDPI journal article supplement (doi:10.3390/life12010054), 2021-12-31
Supplement: s1 [file s1]

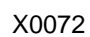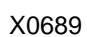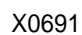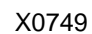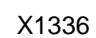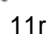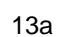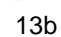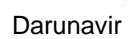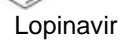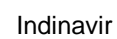

**Figure S1.** The used ligands in this work.

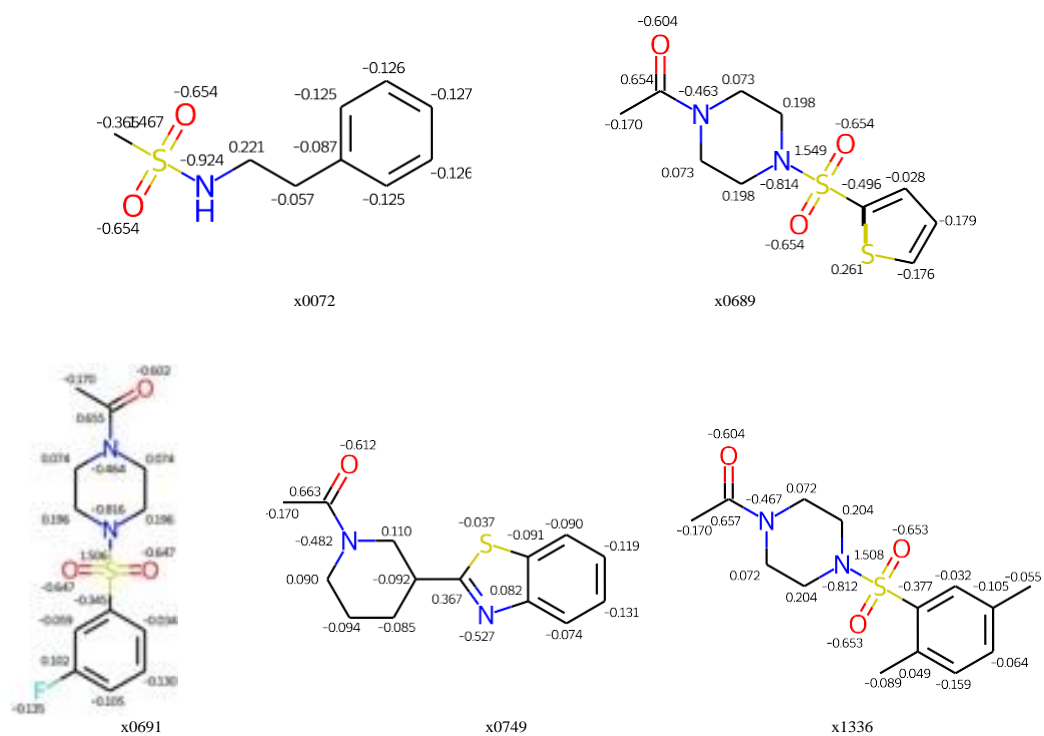

**Figure S2.** The partial charge represented ligand figures generated by gaff. Ligands are x0072, x0689, x0691, x0749, and x1336

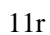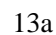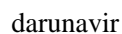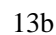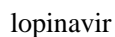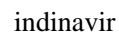

3/20

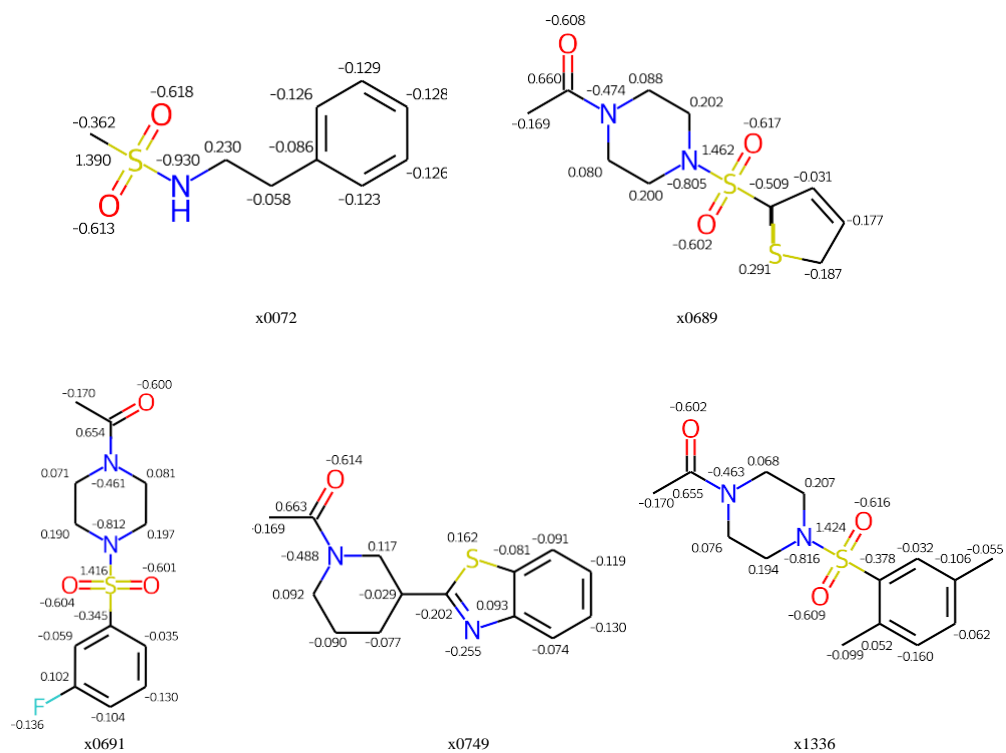

**Figure S4.** The partial charge represented ligand figures generated by charmm-gui. Ligands are x0072,x0689, x0691, x0749, and x1336

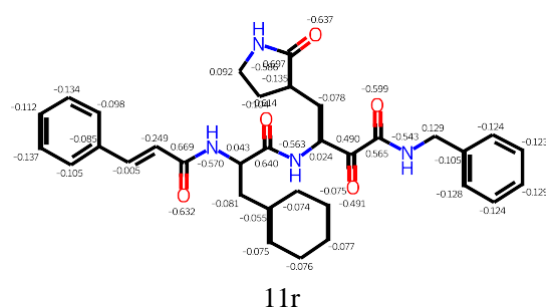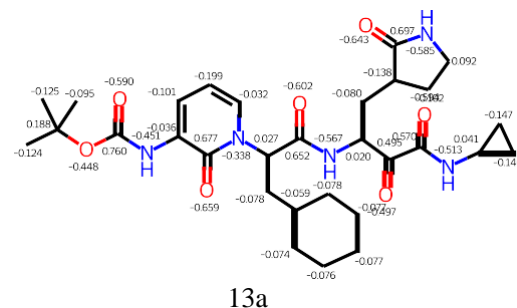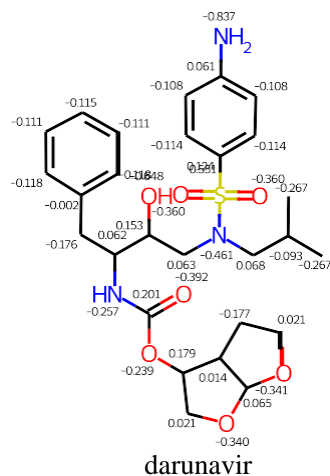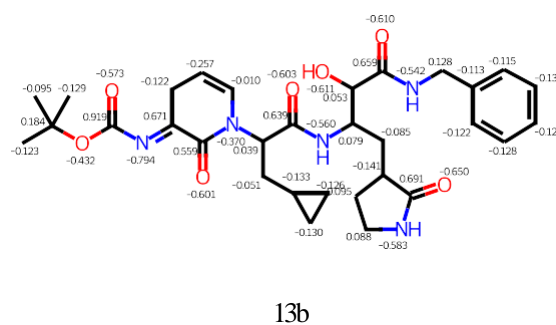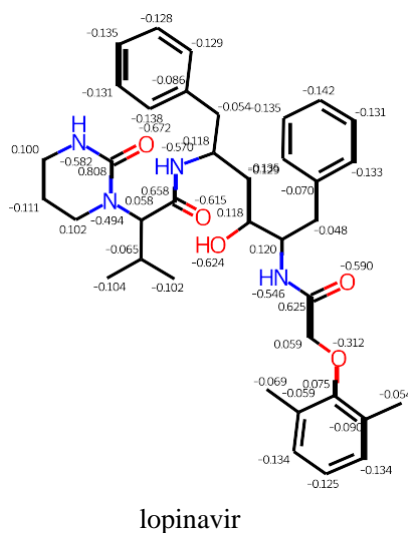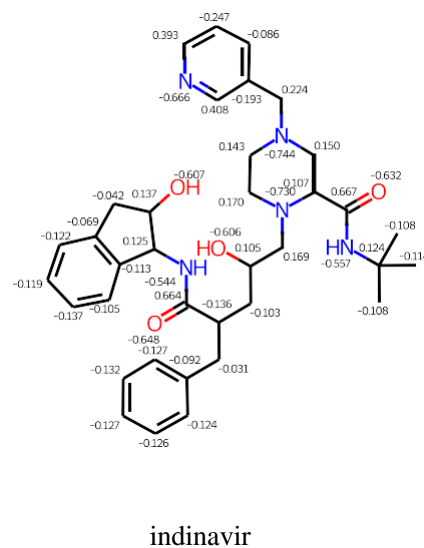

**Figure S5.** The partial charge represented ligand figures generated by charmm-gui. Ligands are 11r, 13a, 13b, darunavir, lopinavir, and indinavir

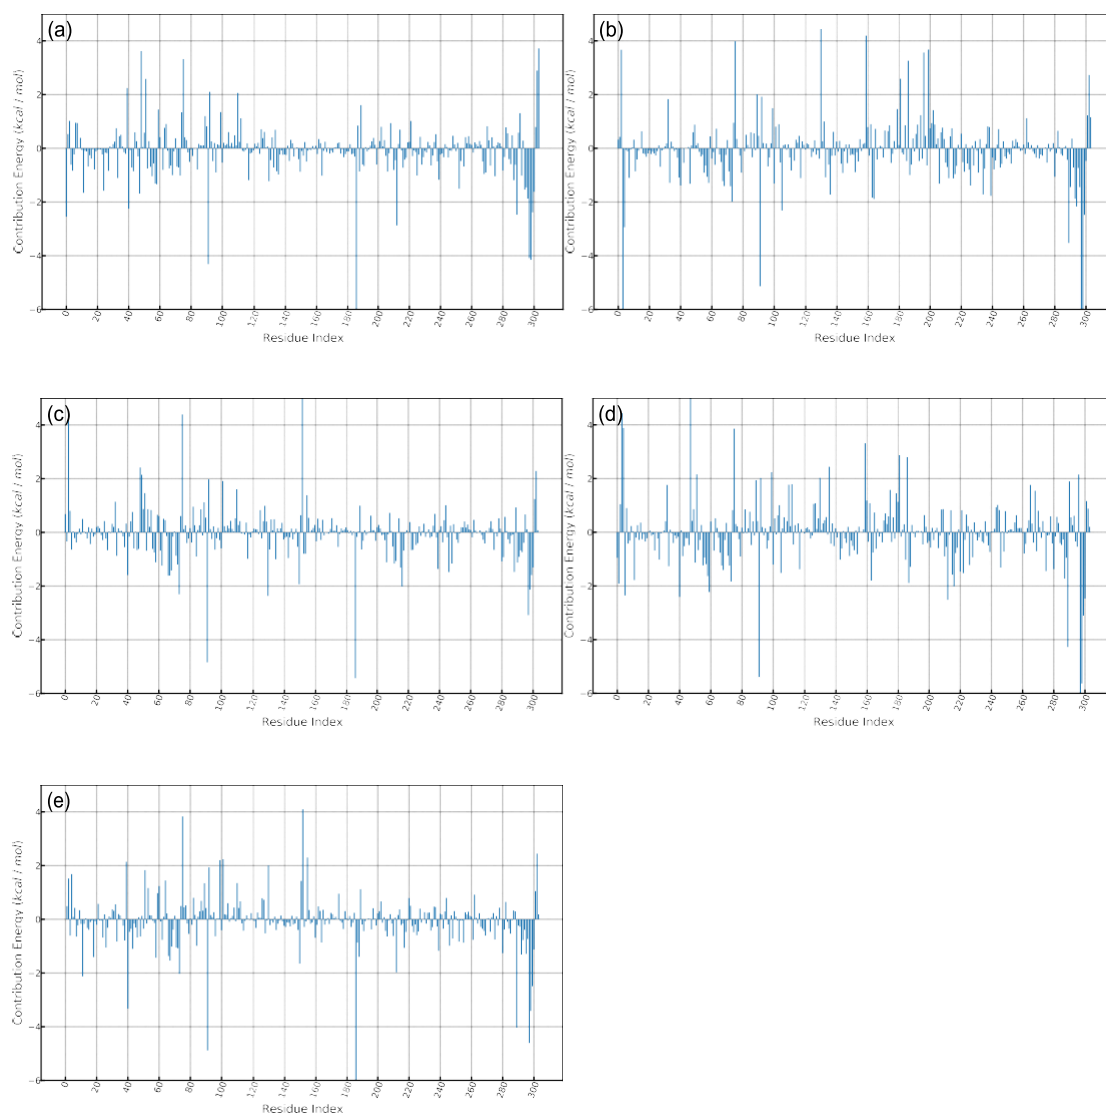

**Figure S6.** MM-PBSA decomposed energy per-residue with ff99SB (a) X0072 (b) X0689 (c) X0691 (d)X0749 (e) X1336

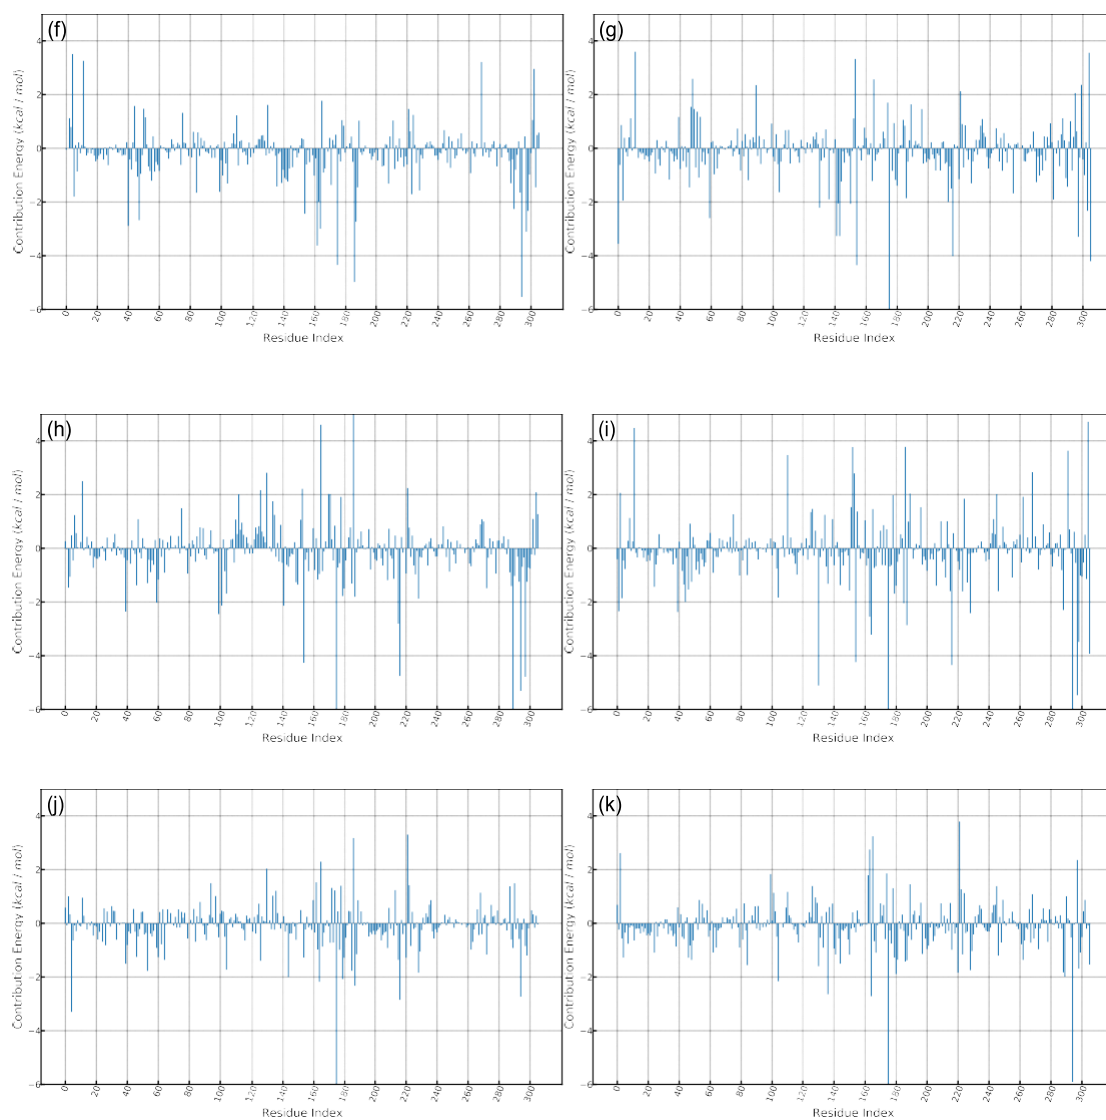

**Figure S7.** MM-PBSA decomposed energy per-residue with ff99SB (f) 11r (g) 13a (h) 13b (i) darunavir (j) lopinavir (k) indinavir

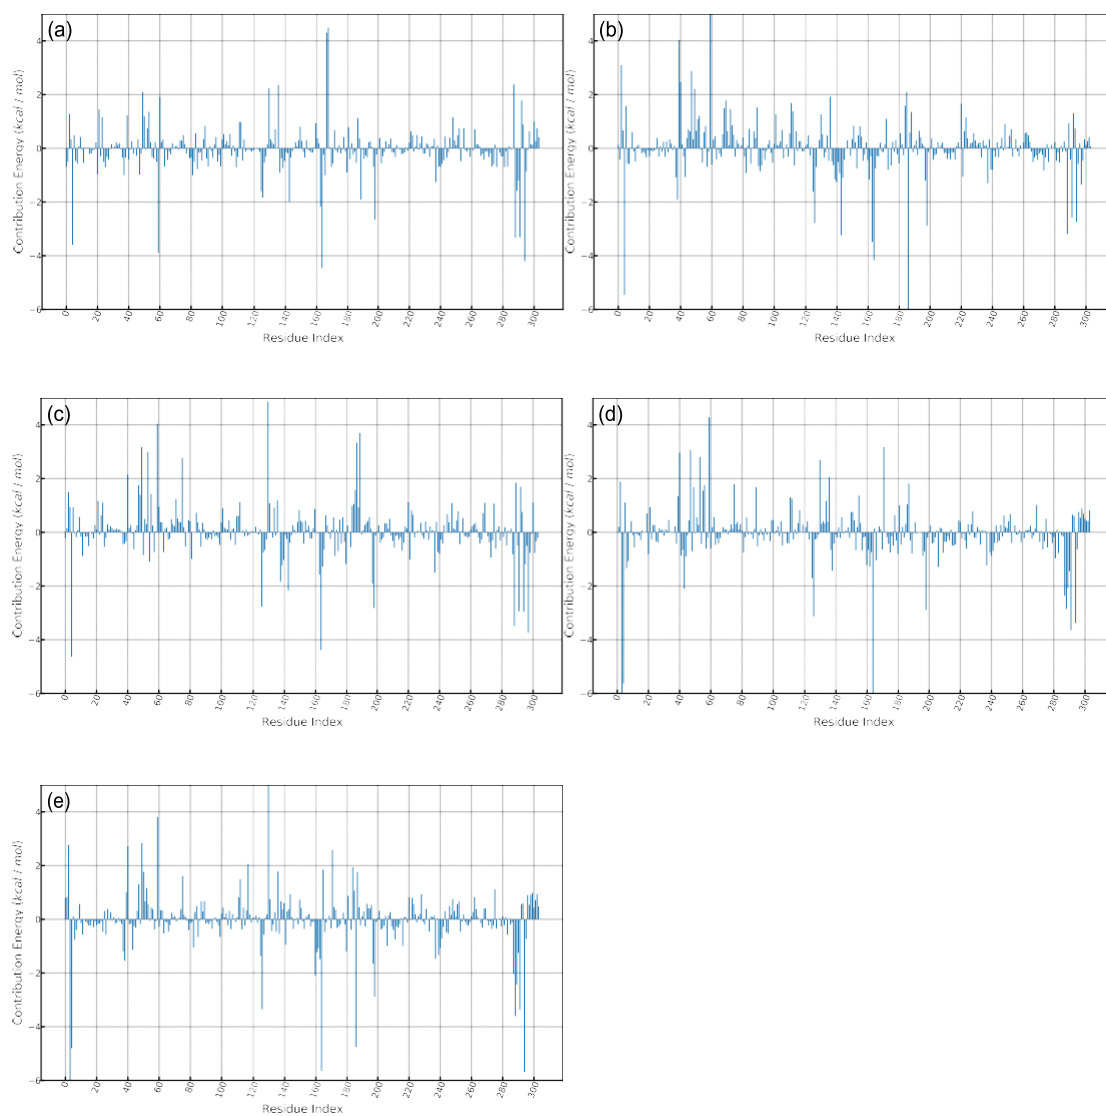

**Figure S8.** MM-PBSA decomposed energy per-residue with c36 (a) X0072 (b) X0689 (c) X0691 (d)X0749 (e) X1336



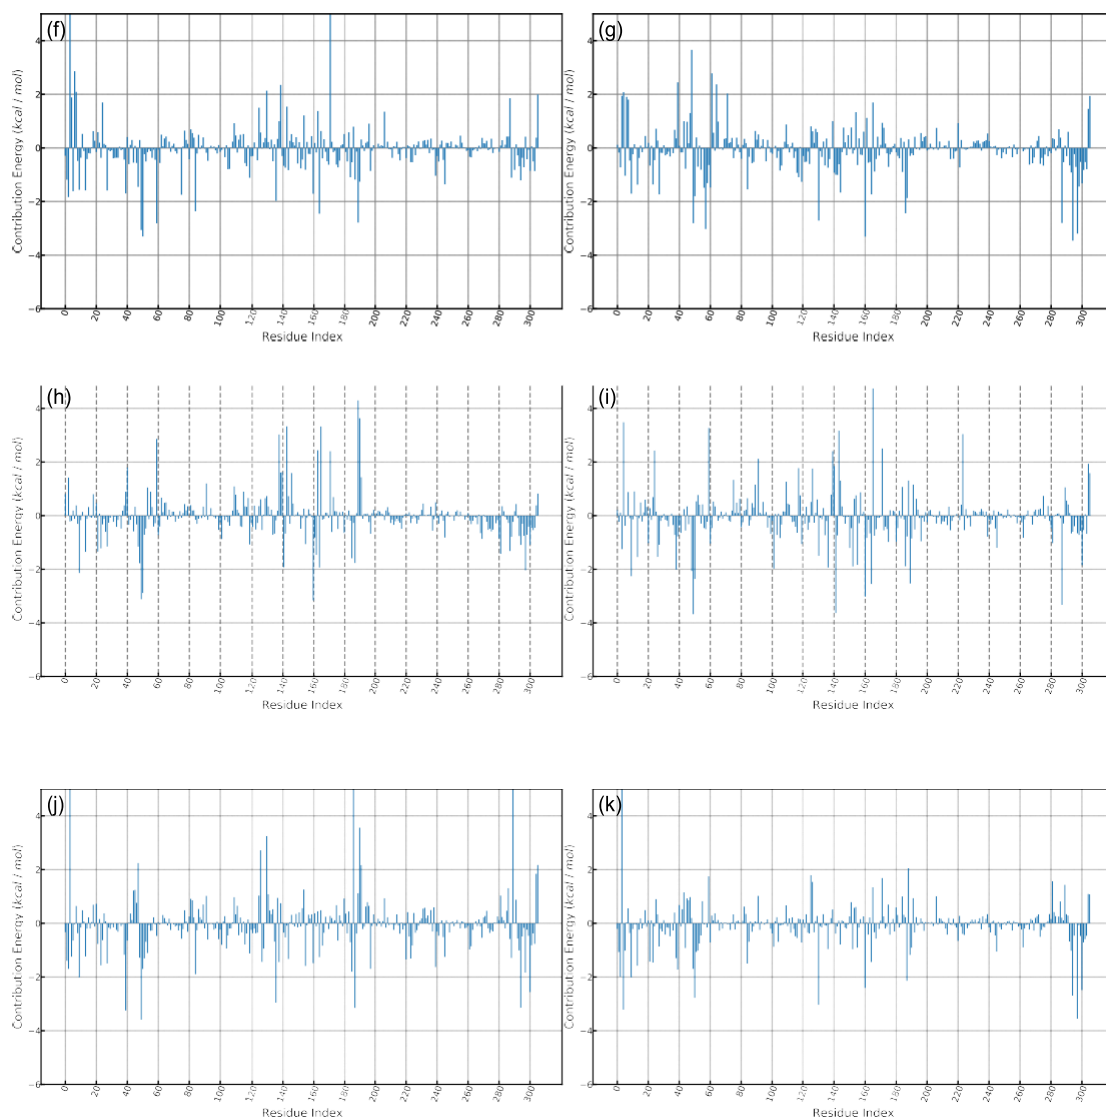

**Figure S9.** MM-PBSA decomposed energy per-residue with c36 (f) 11r (g) 13a (h) 13b (i) darunavir (j)lopinavir (k) indinavir

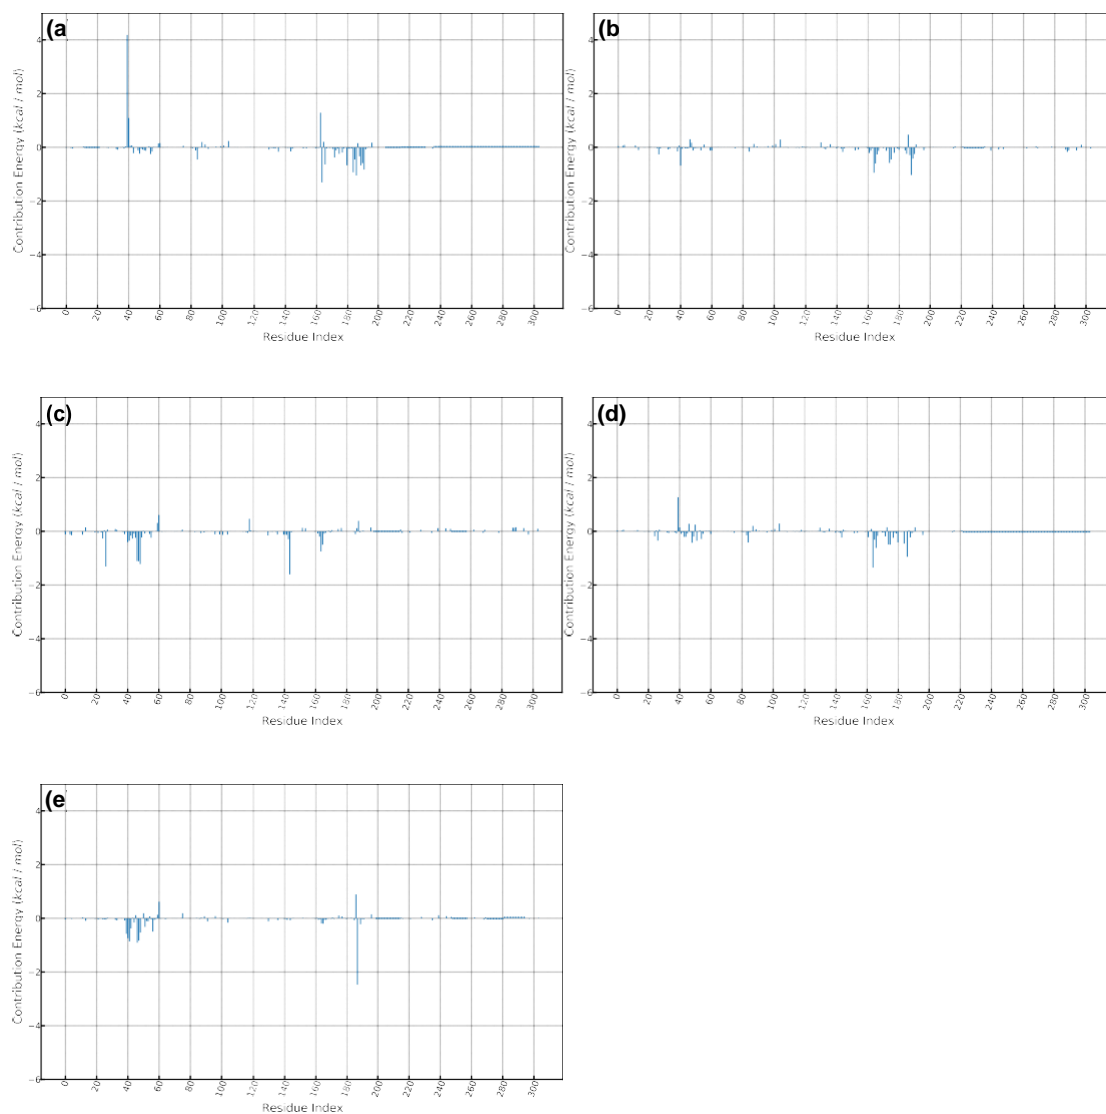

**Figure S10.** MM-PBSA Decomposed energy per-residue with g54a7 (a) X0072 (b) X06889 (c) X0691(d) X0749 (e) X1336

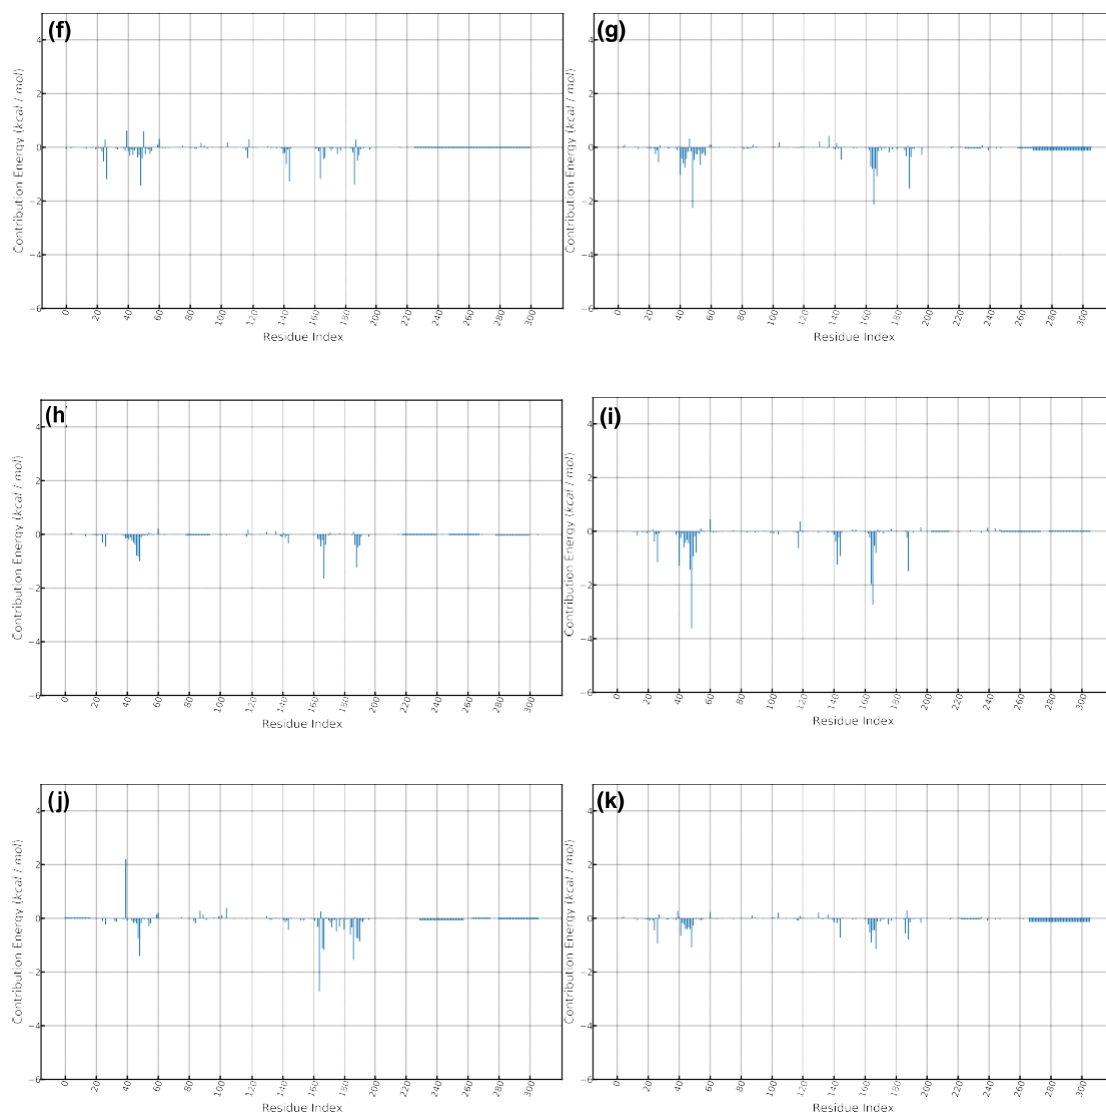

**Figure S11.** MM-PBSA Decomposed energy per-residue with g54a7 (f) 11r (g) 13a (h) 13b (i) darunavir (j) lopinavir (k) indinavir

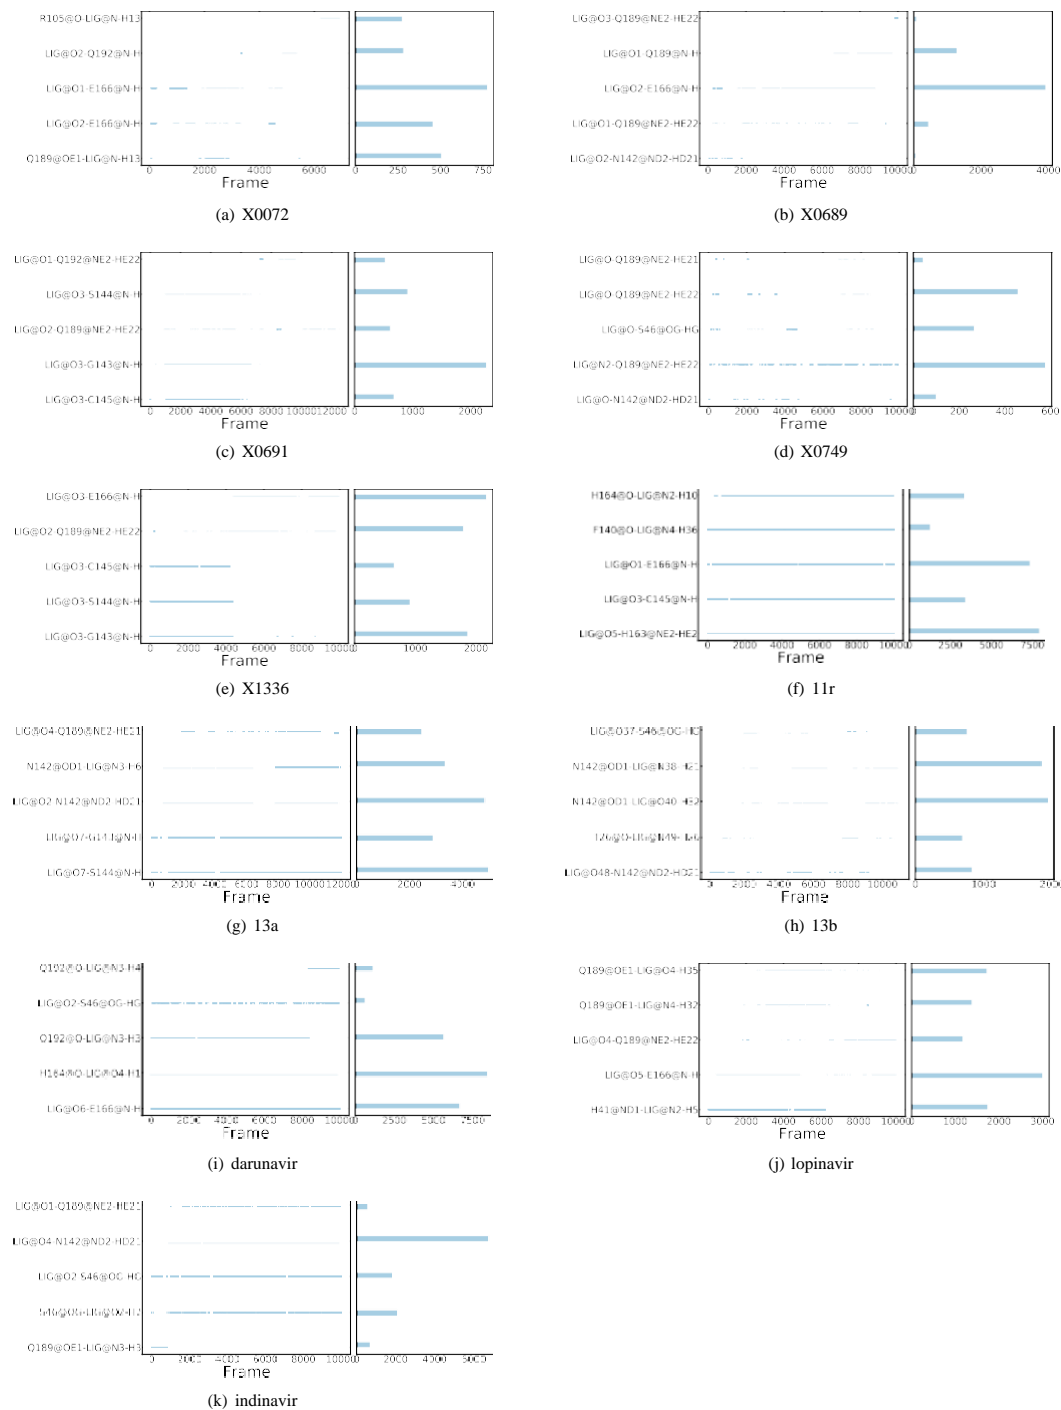

**Figure S12.** Hydrogen bond existence map with ff99SB

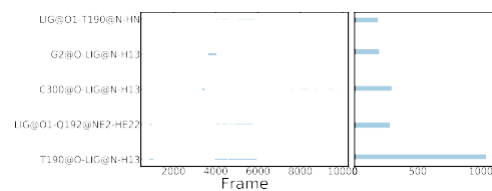

(a) X0072

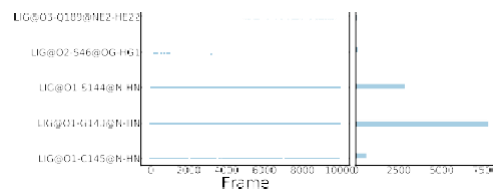

(b) X0689

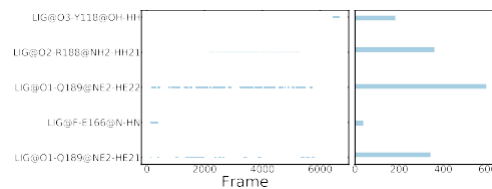

(c) X0691

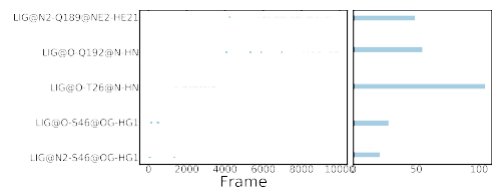

(d) X0749

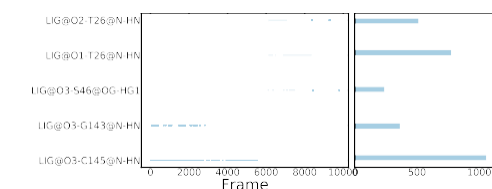

(e) X1336

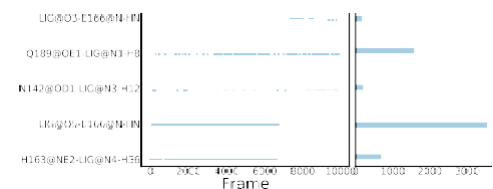

(f) 11r

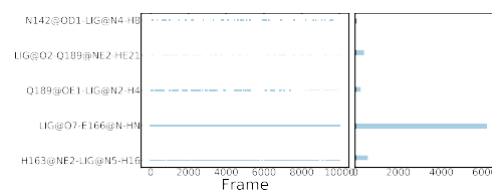

(g) 13a

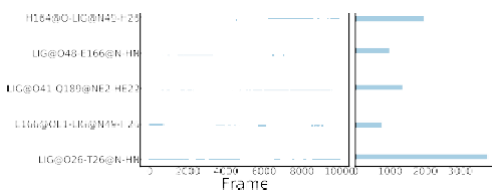

(h) 13b

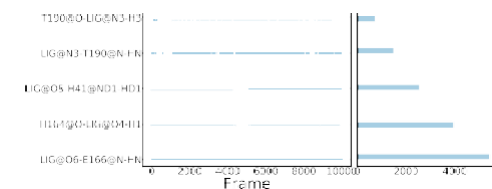

(i) darunavir

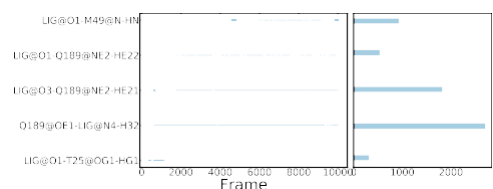

(j) lopinavir

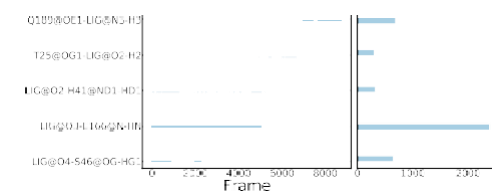

(k) indinavir

**Figure S13.** Hydrogen bond existence map with c36

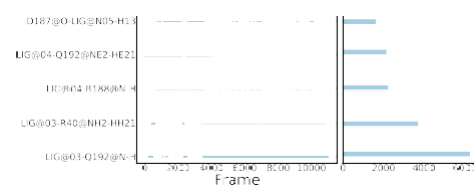

(a) X0072

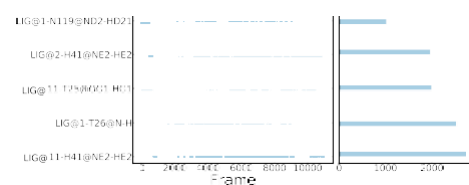

(b) X0689

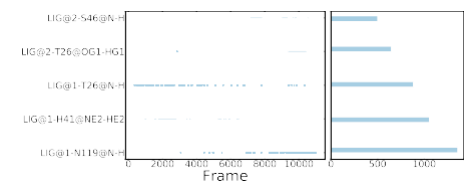

(c) X0691

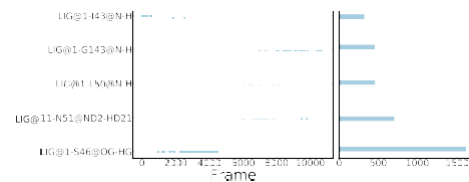

(d) X0749

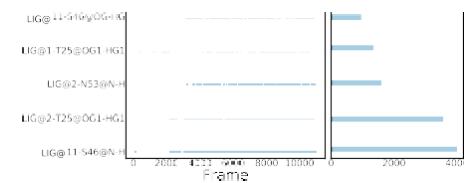

(e) X1336

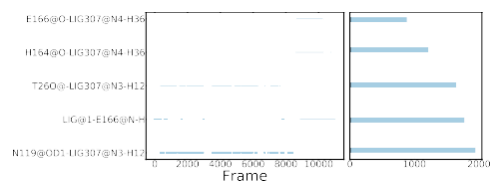

(f) 11r

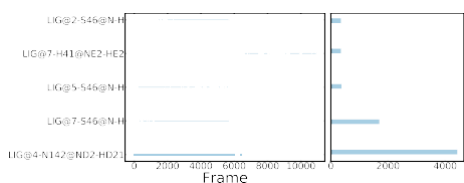

(g) 13a

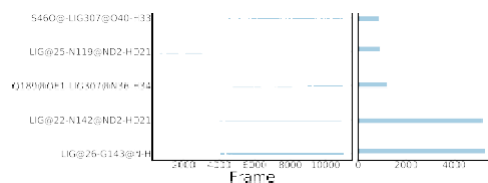

(h) 13b

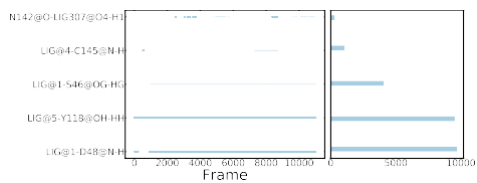

(i) darunavir

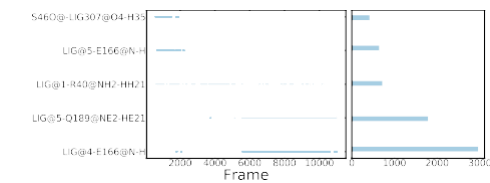

(j) lopinavir

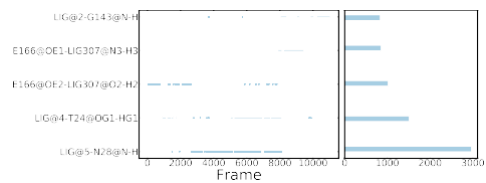

(k) indinavir

**Figure S14.** Hydrogen bond existene map with g54a7

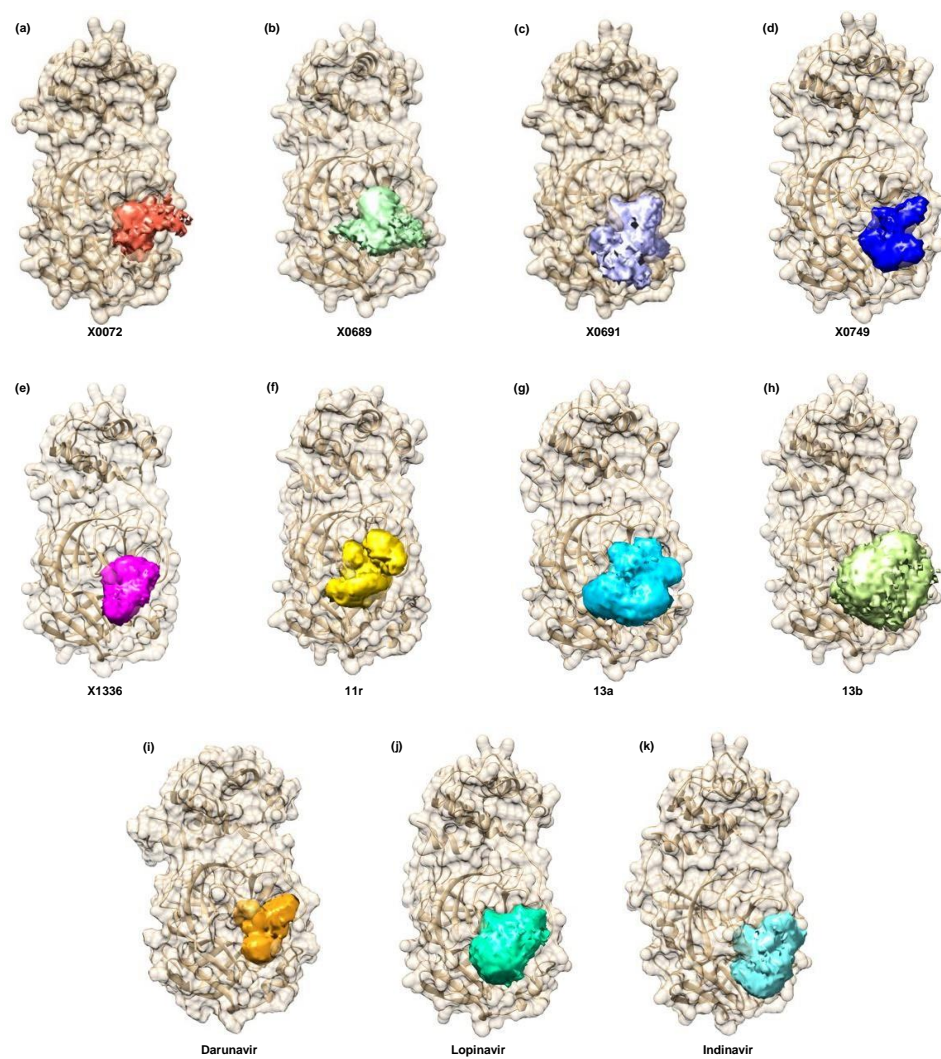

**Figure S15.** 3D histogram from the production trajectories with ff99SB

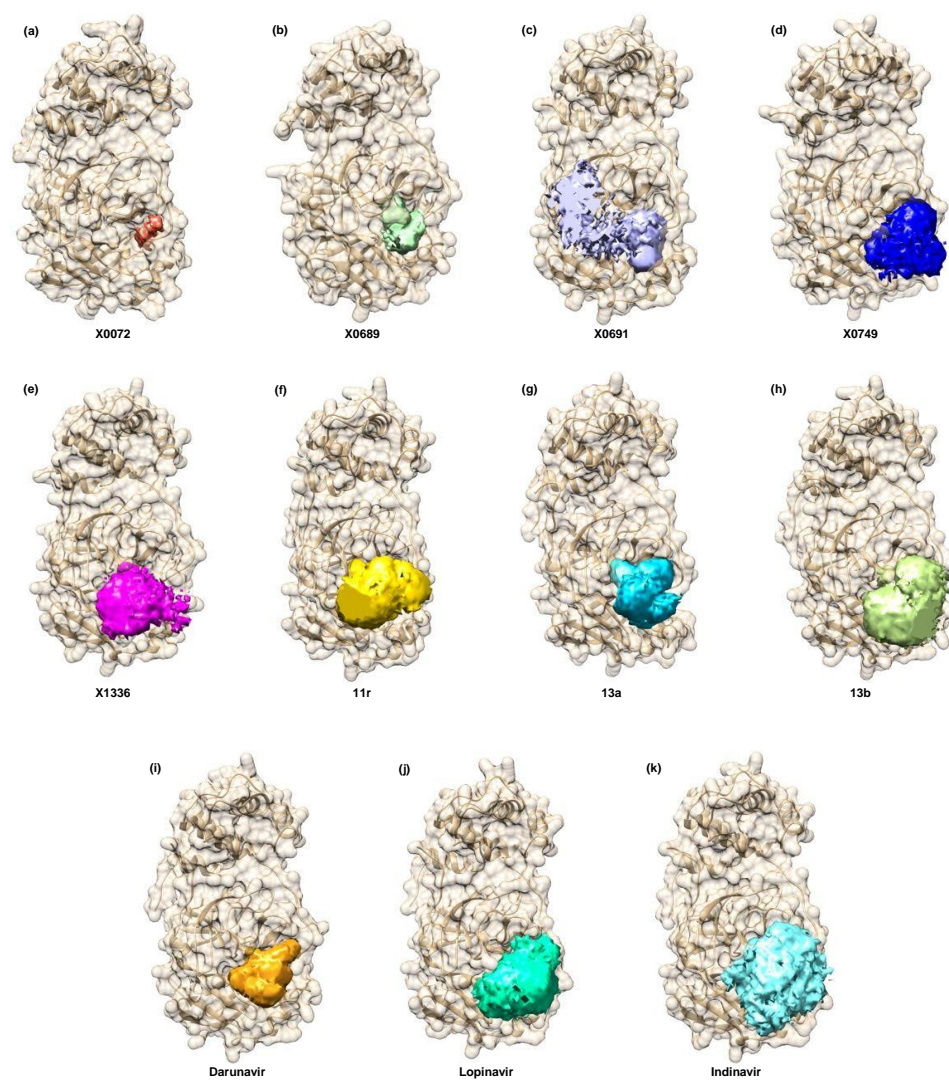

**Figure S16.** 3D histogram from the production trajectories with c36



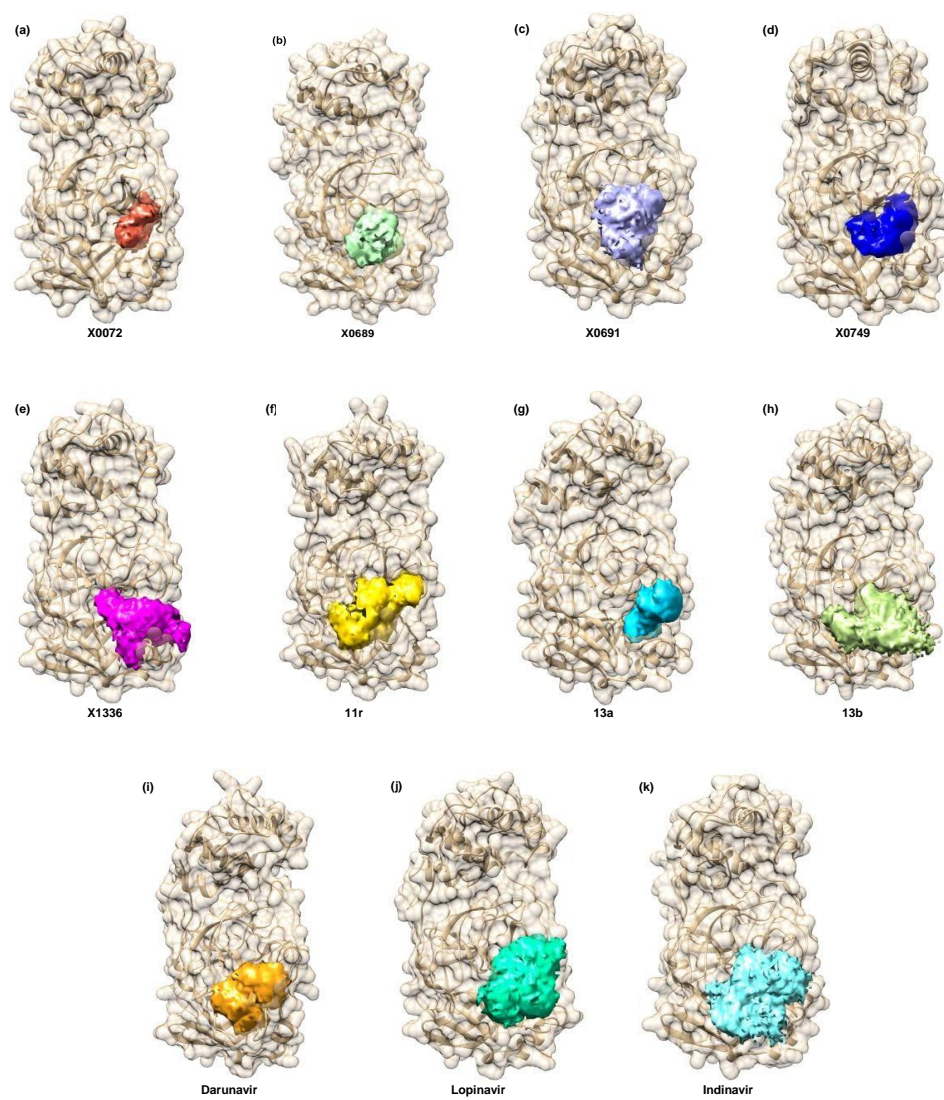

**Figure S17.** 3D histogram from the production trajectories with g54a7



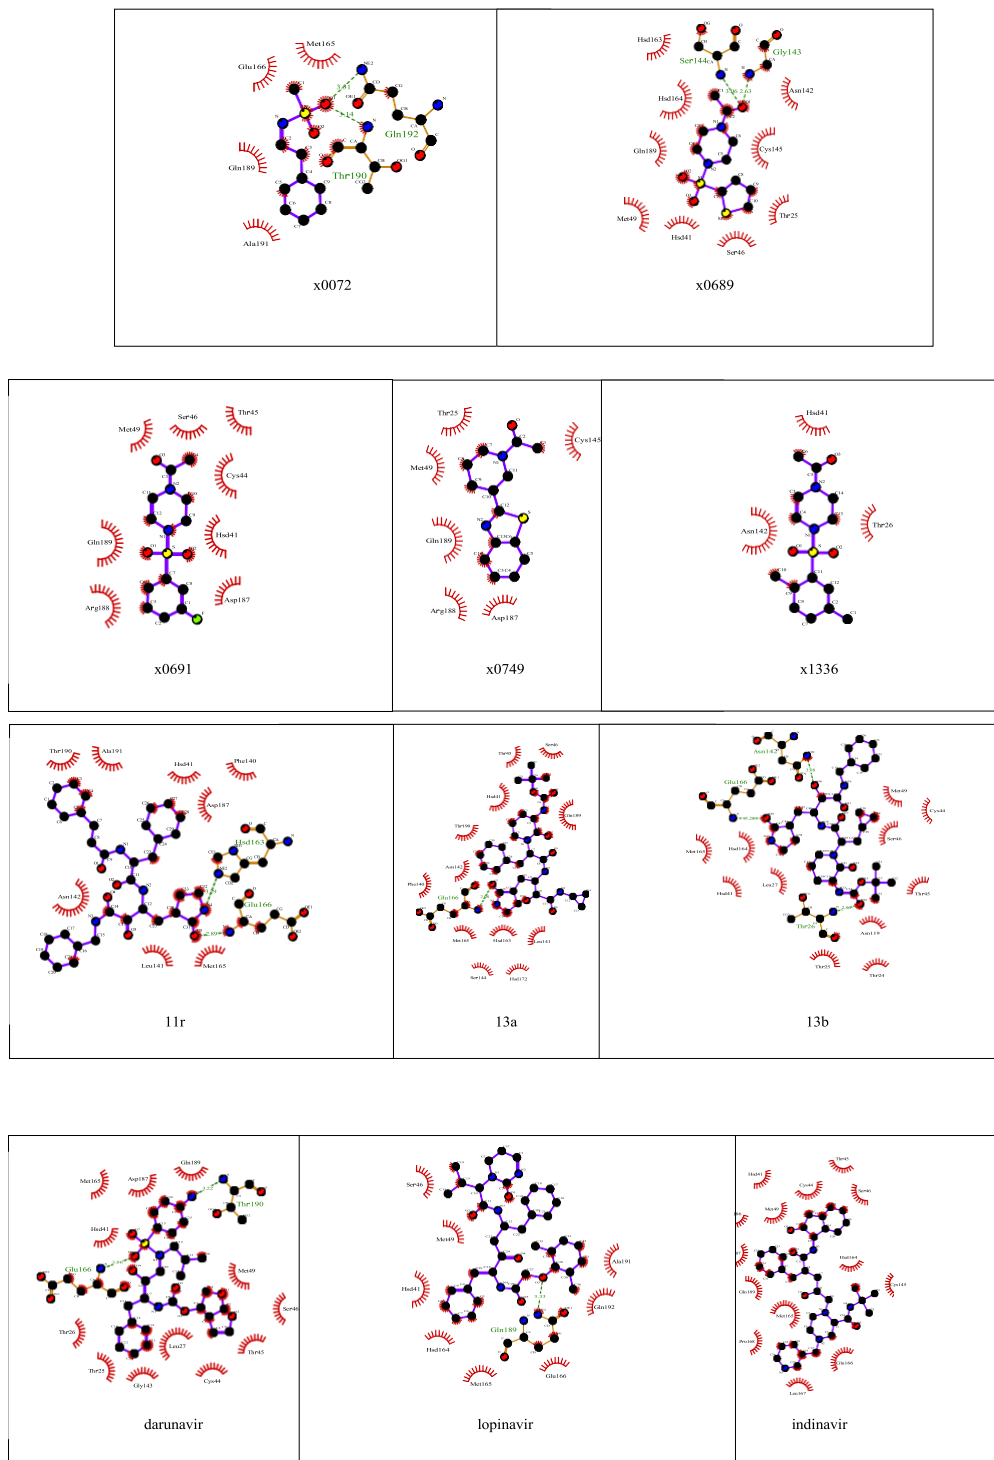

**Figure S19.** The protein-ligand interaction plot generated by ligPlot+ program with c36 force field

**Table S1.** Each energetic components of  $DG_{\text{component}}$  (kcal/mol) of each ligand-M<sup>Pro</sup> calculated by the MM-PBSA analysis.

| Ligand           | $E_{vdw}$ | $E_{elec}$ | $E_{MM}$ | $E_{PB}$ | $E_{nonpol}$ | $E_{sol}$ | $E_{total}$ |
|------------------|-----------|------------|----------|----------|--------------|-----------|-------------|
| <b>X0072</b>     |           |            |          |          |              |           |             |
| ff99SB           | -34.56    | -21.98     | -55.91   | -14.49   | 35.54        | 21.05     | -34.86      |
| c36              | -12.54    | -75.34     | -83.03   | 35.95    | 30.18        | 66.13     | -17.30      |
| g54a7            | -31.61    | -17.17     | -48.78   | 38.24    | -3.12        | 35.12     | -13.66      |
| <b>X0689</b>     |           |            |          |          |              |           |             |
| ff99SB           | -50.56    | -111.34    | -154.66  | 69.21    | 62.23        | 131.44    | -23.22      |
| c36              | -20.07    | 38.12      | 12.66    | -41.79   | 33.60        | -8.19     | 3.94        |
| g54a7            | -30.54    | -17.38     | -47.92   | 28.61    | -2.92        | 25.68     | -22.24      |
| <b>X0691</b>     |           |            |          |          |              |           |             |
| ff99SB           | -26.76    | -13.66     | -47.07   | 3.85     | 34.14        | 38.00     | -9.08       |
| c36              | -11.19    | -2.63      | -17.93   | 7.49     | 23.60        | 31.09     | 12.18       |
| g54a7            | -28.19    | -14.32     | -42.51   | 24.83    | -2.87        | 21.96     | -20.55      |
| <b>X0749</b>     |           |            |          |          |              |           |             |
| ff99SB           | -42.95    | -20.21     | -62.54   | -8.86    | 53.23        | 44.37     | -18.17      |
| c36              | -31.06    | -53.27     | -92.13   | 34.89    | 44.00        | 78.89     | -13.24      |
| g54a7            | -38.32    | -6.22      | -44.54   | 26.06    | -3.56        | 22.50     | -22.04      |
| <b>X1336</b>     |           |            |          |          |              |           |             |
| ff99SB           | -37.13    | 24.50      | -18.83   | -51.88   | 46.99        | -4.89     | -23.73      |
| c36              | -7.08     | -47.02     | -63.11   | 28.08    | 26.98        | 55.07     | -8.93       |
| g54a7            | -31.97    | -23.57     | -55.55   | 35.98    | -3.17        | 32.81     | -22.73      |
| <b>11r</b>       |           |            |          |          |              |           |             |
| ff99SB           | -68.82    | -24.22     | -91.33   | -37.34   | 73.68        | 36.34     | -54.99      |
| c36              | -32.06    | -14.22     | -46.84   | -12.54   | 49.77        | 37.23     | -10.18      |
| g54a7            | -53.31    | -11.87     | -65.18   | 33.43    | -6.16        | 27.27     | -37.91      |
| <b>13a</b>       |           |            |          |          |              |           |             |
| ff99SB           | -43.84    | -97.48     | -146.15  | 51.74    | 56.44        | 108.18    | -37.97      |
| c36              | -27.47    | -53.46     | -69.46   | -3.84    | 44.60        | 40.76     | -28.52      |
| g54a7            | -56.01    | -14.01     | -70.02   | 31.60    | -5.19        | 26.41     | -43.61      |
| <b>13b</b>       |           |            |          |          |              |           |             |
| ff99SB           | -35.98    | -17.60     | -52.33   | -25.44   | 48.24        | 22.80     | -29.54      |
| c36              | -35.20    | -138.26    | -171.51  | 116.50   | 60.66        | 177.16    | 5.58        |
| g54a7            | -38.31    | -18.49     | -56.80   | 29.35    | -4.48        | 24.87     | -31.93      |
| <b>DARUNAVIR</b> |           |            |          |          |              |           |             |
| ff99SB           | -57.96    | -50.70     | -110.38  | -0.73    | 60.82        | 60.10     | -50.29      |
| c36              | -44.52    | -90.10     | -124.84  | 58.39    | 64.57        | 122.96    | -1.56       |
| g54a7            | -52.76    | -23.14     | -75.90   | 34.72    | -5.45        | 29.26     | -46.64      |
| <b>INDINAVIR</b> |           |            |          |          |              |           |             |
| ff99SB           | -67.49    | 11.94      | -54.86   | -49.95   | 75.58        | 25.62     | -29.24      |
| c36              | -33.10    | -20.36     | -59.65   | -3.66    | 42.03        | 38.37     | -21.34      |
| g54a7            | -44.27    | -13.41     | -57.68   | 26.13    | -4.59        | 21.54     | -36.14      |
| <b>LOPINAVIR</b> |           |            |          |          |              |           |             |
| ff99SB           | -53.21    | 10.14      | -35.53   | -47.76   | 66.23        | 18.47     | -17.06      |
| c36              | -36.66    | -33.91     | -63.79   | -1.39    | 52.52        | 51.13     | -13.17      |
| g54a7            | -53.32    | -11.17     | -64.49   | 29.31    | -5.57        | 23.74     | -40.74      |
